# Supplementary material for: Genome-wide identification and expression analysis of calmodulin-like proteins in cucumber
Source: PeerJ. 2023 Jan 13;11:e14637. doi: 10.7717/peerj.14637 (PMC9841910; doi:10.7717/peerj.14637)
Supplement: Supplemental Information 2 [file peerj-11-14637-s002.xlsx]

## Sheet: Sheet1
Data S1.The protein sequences used in the phylogenetic analysis
Gene name	Gene ID	Sequences
OsCML1	LOC_Os01g59530	MADQLSEEQIGEFREAFSLFDKDGDGSITTKELGTVMRSLGQNPTEAELQDMISEVDTDSNGNIEFKEFLGLMARKLRDKDSEEELKEAFRVFDKDQNGFISATELRHVMANIGERLTDEEVGEMISEADVDGDGQINYEEFVKCMMAKKRRKRIEEKRDHDGGSRTKSAGPSAAPASKRGQKCVIL
OsCML2	LOC_Os11g03980	MDHLTKEQIAEFREAFNLFDKDGDGTITSKELGTVMGSLGQSPTEAELKKMVEEVDADGSGSIEFEEFLGLLARKLRDTGAEDDIREAFRVFDKDQNGFITPDELRHVMANLGDPLSDDELADMLHEADSDGDGQINYNEFLKVMMAKRRQNMMEGHGSGGHRSSNSHKKSGCCGPNSSCTIL TIL
OsCML3	LOC_Os12g03816	MDHLTKEQIAEFREAFNLFDKDGDGTITSKELGTVMGSLGQSPTEAELKKMVEEVDADGSGSIEFEEFLGLLARKLRDTGAEDDIREAFRVFDKDQNGFITPDELRHVMANLGDPLSDDELADMLHEADSDGDGQINYNEFLKVMMAKRRQNMMEGHGSGGHRSSNSHKKSGCCGPNSSCTIL GSIEFEEFLGLLARKLRDTGAEDDIRDAFRVFDKDQNGFITPDELRHVMANLSDPLSDDE LADMLHEADSDGDGQINYNEFLKVMMAKRRQNMMEGHGSGGHRSSNSHKKSGCCGPNSSC TIL GSIEFEEFLGLLARKLRDTGAEDDIRDAFRVFDKDQNGFITPDELRHVMANLSDPLSDDE LADMLHEADSDGDGQINYNEFLKVMMAK…
OsCML4	LOC_Os03g53200	MEGLTSEQMVAFQEAFLLFDKNGDGCITLEELAAVTRSLGLEPTDQELNDMMREVDTDGNGIIDFQEFLSLIARKMKDGDGDEELKEAFEVLDKDQNGFISPTELRTVMTNLGEKMTDEEVEQMIREADTDGDGQVNYDEFVIMMKNAERKISG
OsCML5	LOC_Os12g41110	MAEVEVRVRQEQVAEFRETFAFFDKDGDGCITLEELDTVVRSLGQTPTREELAEMIRDVDVDGNGTIEFAEFLALMARKASRGGENGGGGDDSGDAADEELREAFKVFDKDQDGLISAAELRHVMISLGEKLTDEEVEQMIREADLDGDGQVNFDEFVRMMMLSDQ
OsCML6	LOC_Os11g37550	MESHLNEQQISDFRDAFSLFDKNNDGCISREELATVLTRLGMAPSQEDLQDMIVAVDEDGNGTIEFDEFLAIMKKKLYENDKGDDEEELRKAFRIFDKDDNGFISRNELSMVMASLGEEMTEDEIDDMMKAADSNNDGQVDYEEFKRVMMSTWNITEIFKPHVTIWRYKP
OsCML7	LOC_Os08g02420	MGGKELSEEQVASMREAFSLFDTDGDGRIAPSELGVLMRSLGGNPTQAQLRDIAAQEKLTAPFDFPRFLDLMRAHLRPEPFDRPLRDAFRVLDKDASGTVSVADLRHVLTSIGEKLEPHEFDEWIREVDVAPDGTIRYDDFIRRIVAK
OsCML8	LOC_Os10g25010	MASKYRGYYHDEASSAAGGGGGGGGGDGYRREKQVRKKRLTAQKRKEIKEAFDLFDTDGSGTIDPKELNVAMRALGFEMTPEQIHQMIAEVDKDGSGTIDFDEFVHMMTDKMGERDAREELNKAFKIIDKDNNGKISDVDIQRLAIETGEPFTLDEVREMIEAADENGDGEVDHEEFLKMMKRIGFGAGF
OsCML9	LOC_Os05g41200	MAAKLTQEQVDECREIFDLFDSDEDGRIAAGELVTALRSLGQNVDEAEARRFLADATASGGGGGGGGDIDFAAFLSVAARKMRRGATEKELAACLDVFDDARSGVIPAEQLRQAMVSHGDRLTEEEADEMVRKADPAGEGRVEYKEFVKVLMNNK
OsCML10	LOC_Os01g72100	MVKIKMPALFRRRSGSKSPPLPQADPASGGGSPAPTPEEEMERVFRKFDANGDGRISRSELGALFESLGHAATDDELARMMAEADADGDGFISLDEFAALNATASGDAAAVEEDLRHAFRVFDADGNGTISAAELARVLHGLGEKATVQQCRRMIEGVDQNGDGLISFEEFKVMMAGGGSFAKIA
OsCML11	LOC_Os01g32120	MSEPATTTPTPTPAGDHDAAATACKPAETTTALITCRSSSCSAQQQQQQQQQQEEPLGDDQLGELREIFRSFDRNGDGSLTQLELGSLLRSLGLKPSTDELDSLIQRADTNSNGLIEFSEFVALVAPELLYDRAPYSEDQIRRLFNIFDRDGNGFITAAELAHSMAKLGHALTVKELTGMIKEADTDGDGRISFQEFSRAITAAAFDNIFS
OsCML12	LOC_Os01g41990	MQSQRERPREDRVHEETRGADHAHPSVPHAAAAASATATETATRTMSLHAGGVVVVDGKEKGKKEEGEGKRKGKAPATAEAVRGRARLRGEQLRQLHEIFLRFDLDGDGSLTKLELAALLRSLGLRPAAGDEIHALIAAIDADGNGTVEFDELASSLADLILGPCRPSVAVDQAELAEAFRAFDRDGNGFISAAELARSMARMGHPICYAELTDMMREADTDGDGLISFEEFTAIMAKSALDFLGLAAL
OsCML13	LOC_Os07g42660	MSTVKGQTRRERPRGARPHGLTKQKRQEIKEAFDLFDTDNSGTIDAKELNVAMRALGFEMTEEQINQMIADVDKDGSGSIDYEEFEHMMTAKIGERDSKEELTKAFSIIDQDKNGKISDVDIQRIAKELGENFTYQEIQEMVQEADRNGDGEIDFDEFIRMMRRTGYGY
OsCML14	LOC_Os05g50180	MTTMAARRSEAAPAPQQLRGSQLKQLRELFRRFDMNGDGSLTQLELAALLRSLGLRPTGDEVHALLAGMDANGNGSVEFDELAAAIAPVLTTQTHLVDQAQLLEVFRAFDRDGNGFISAAELARSMARLGQPLTFEELTRMMRDADTDGDGVISFKEFAAVMAKSALDFLGVA
OsCML15	LOC_Os05g31620	MGKVRAFFSRKGRGNSSGRSRSMREAAMNVDWSPRPSDLAAAAAAKPRPPAAEDETERVFRKFDANGDGRISRAELAALFRSVGHAVTDDEVARMMQEADSDGDGYISLGEFAAISAPPPGDAAAAEEDLRHAFGVFDADGNGVITPAELARVLRGIGEAATVAQCRRMIDGVDRNGDGLINFEEFKLMMAAGAGFGRIAS
OsCML16	LOC_Os01g04330	MSNTTEKKMPQQQQVERPTALAPADAEIERVFTRFDADGDGRISPSELAAVTRAIAPPPSESAGGREVAAMMNELDTDRDGFVDLGEFAAFHGRGRGDAEHEAELRAAFDVYDVDGDGRITAAELGKVLGRIGEGCSAEECERMIASVDVDGDGCVGFEEFKKMMCRDAAATGGADKAKTE
OsCML17	LOC_Os02g39380	MACDQQAELRRVFELFDRDGDGRITREELTESLERLGMPVHREELAATIARIDANGDGCVDMDEFTQLYETVMRVDGGGGGGGGACDVDEASMREAFDVFDRNGDGFITVDELGAVLASLGIKQGRTAEDCGRMIGQVDRDGDGRVDFLEFKQMMRGGAFATLR
OsCML18	LOC_Os05g13580	MPMAELEQVFRRYDANGDGKISAEELASVLRALGAPLGPGEVRRMMDEMDSDRDGFVDLSEFAAFHCGPTPAHGGKGGDAKDQEAASEAELREAFRMYDADSNGKISARELHRVLRQLGDKCSVADCSRMIRSVDADGDGCVNFDEFKKMMGGGGGRR
OsCML19	LOC_Os01g72550	MVAATAEFRRVFSAFDRDADGKISAAELRLCMKAALGEDMSAEEAEALVSSADTDDDGLLDEEEFTKLAVQLEMGDEEERCRGLMEAFRMYEMEGEGRITPASLKRMLSKLGSHQGIEECQTMICRFDLDGDGVISFEEFKIMMDA
OsCML20	LOC_Os02g50060	MGLVVSAAASCGRLRRSRSRSPPPAVLDPSQSPLSLEREAEPELIRVFRCFDTDGDGLISAAEMREFYGCSVDEAEEMVAAADRDGDGFVSIEELRAVMEGGGLDALRAAFDEYDEDGNGVITAEELRRALRRLNLDGMDLTAEQCAEIVAAVDSDGDGVISFDEFKAMMSKQA
OsCML21	LOC_Os05g24780	MLRPPPPSSVLTASAAAARPPASVVQPQRQAAHRRRAETLRLRRVFEMFDRDGDGVITPAELSGALCRLGARGEAPPAAAALDAVVAAYIAPGMAGLRFAEFEALHAELAGLGGRQAVAAAEAEEEKEADMREAFGVFDEDGDGYISAAELQAVLSRMGLPEAACMARVRDMIAAADRDSDGRVDYEEFKAMMAAGN
OsCML22	LOC_Os04g41540	MSCQVPTVPASPVVKFPLLPRGLLSYLPANLSSILPVARGAASTCEASSTTTTTMPPEPPASPPPPKKMSPPGAGAGAGSKKKQQQQADAAELARVFELFDRNGDGRITREELEDSLGKLGIPVPADELAAVIARIDANGDGCVDVEEFGELYRSIMAGGDDSKDGRAKEEEEEEDGDMREAFRVFDANGDGYITVDELGAVLASLGLKQGRTAEECRRMIGQVDRDGDGRVDFHEFLQMMRGGGFAALG
OsCML23	LOC_Os01g72540	MVASDEFRRVFGSFDQDGDGKISATELRLCVKASLGEDMPDEEVQALMALADTDGDGLLDEEEFVRLVTEMEADGDEEEDDDDETCRCLREAFAMYEMEGRGCITPLSLKLMLSKLGTHLDVAECQAMICRFDMNGDGVLTFDEFKTMMMA
OsCML24	LOC_Os07g48340	MEGEQQQQQQQSVAAVRPSLGKAPSPSFRLRNGSLNAVRLRRVFDLFDRNGDGEITVDELAQALDALGLEADRAGLAATVGAHVPDGAAGLRFEDFESLHRALGDALFGSLDVPEDGGGGGGGDEEMKEAFKVFDVDGDGFISASELQEVLKKLGMPEAGSLANVREMICNVDRDSDGRVDFGEFKCMMQGITVFGA
OsCML25	LOC_Os11g01390	MASSASSVFAAFDKDGDGKVSASELRGCMAAALGEEVSEEEAAAILATADTDGDGLLDHHEFMRLSAAHQLQEPAEESLRCLREAFDMYAEEEETAVITPASLRRMLRRLGSEHQRLEMEECRAMICRFDLNGDGVLSFDEFRVMMLMA
OsCML26	LOC_Os12g01400	MASSASSVFAAFDKDGDGKVSASELRGCMAAALGEEVSEEEAAAILATADTDGDGLLDHHEFMRLSAAHQLQEPAEESLRCLREAFDMYAEEEETAVITPASLRRMLRRLGSEHQRLEMEECRAMICRFDLNGDGVLSFDEFRVMMLMA
OsCML27	LOC_Os03g21380	MDAAGVAAKPSLSRKPSPSFRLRNGSLNALRLRRVFDLFDRNGDGEITLDEMASALDALGLGADRAGLEATVGGYIPAGAAGLRFGDFEALHRALGDALFGPVEEEEPGKQGEDDDEGDMKEAFRVFDEDGDGFISAAELQAVLKKLGLPEARNLATVQEMICNVDRDCDGRVDFGEFKCMMQGITVWGA
OsCML28	LOC_Os12g12730	MDSTELRKVFKMFDKNGDGRITKKELGESFKNFGIFIPDDELDATMDKIDANGDGCVDVEEFGLLYRSILGDDAAGRAPRTAAAAIGGEGGAPDDEDEGMREAFNVFDQNGDGFITVDELRSVLSSLGLKHGRTADDCRRMISMVDADGDGRVDFKEFKQMMRGGGFAALGG
OsCML29	LOC_Os06g47640	MATPAGGRPSQPQPQAQQLSVDFEALSYISSLVEAFQAFDSDNDGLVTAPELRGLLASLGLDKPEHEVRDMLARADADRDGKLSVEELLDVMNAGQLGLGALGALLQSAVPALESAAGPDGVLGADELARLLSVMGTASVEDCMEIIACMDGDGDGAISVEEFRLMAQLL
OsCML30	LOC_Os06g07560	MAPLLLLFLLGGLCALFSLASSSPATKKCGDAKKRREEEGEEVVVVAKKRPEEEPRRPDPDADLGIVFSTFDHDGDGFITAAELEESLKRLGIAVSSAAEAAALVARVDANSDGLIDIHEFRELYDSIPKRRKSHQQHPLPSTAAADEEAAAADEEYEAEEEERDLREAFDVFDGNKDGLISAEELGTVLESLGLRQHGGRPAVAECRDMIRLVDSDGDGMVSFEEFKRMMTVVKA
OsCML31	LOC_Os01g72530	MVVASAASPCESSALFATFDHDGDGRISAAELRLCMKTTLGEEVSDEEAGQLVASVDADGDGLLCEAEFVRLVQAAEVEEEDERRGTGLREAFGMYEMEGEGCITPTSLRRMLRRLGSDQDIDDCRAMICRFDLNGDGVLSFDEFKIMMNA
OsCML32	LOC_Os08g04890	MDAKQSVAAAKPSLAKKTASASFRLRNGSLNAVRLRRVFDLFDRNGDGEITVDELAQALDALGLVADRDGLAATVSAYVPEGAAGLRFEDFDALHRALGDALFGSLDGAAAAGEPGGGGGDEEEEMREAFKVFDVDGDGFISASELQEVLKKLGLPEAGSLATVREMICNVDRNSDGRVDFGEFKSMMQGITVWGP
AtCML1	AT3G59450	MPIFQWLKRCLCGDTNITIDQAIALVDEEIANLRKLERGYQTNIRNAENARDQTNVQIERDSFNDTIRLLQAECNLINLEIPTLNEEKFAITRLKSAKHFFGAVSSLKEGKALECCKEMIKQVDEDGHGRVDYKEFLQMMKTGDFSNR
AtCML2	AT4G12860	MDRGELSRVFQMFDKNGDGKIAKNELKDFFKSVGIMVPENEINEMIAKMDVNGDGAMDIDEFGSLYQEMVEEKEEEEDMREAFRVFDQNGDGFITDEELRSVLASMGLKQGRTLEDCKKMISKVDVDGDGMVNFKEFKQMMRGGGFAALSSN
AtCML3	AT3G07490	MDQAELARIFQMFDRNGDGKITKQELNDSLENLGIYIPDKDLVQMIEKIDLNGDGYVDIEEFGGLYQTIMEERDEEEDMREAFNVFDQNRDGFITVEELRSVLASLGLKQGRTLEDCKRMISKVDVDGDGMVNFKEFKQMMKGGGFAALGSNL
AtCML4	AT3G59440	MVRVFLLYNLFNSFLLCLVPKKLRVFFPPSWYIDDKNPPPPDESETESPVDLKRVFQMFDKNGDGRITKEELNDSLENLGIFMPDKDLIQMIQKMDANGDGCVDINEFESLYGSIVEEKEEGDMRDAFNVFDQDGDGFITVEELNSVMTSLGLKQGKTLECCKEMIMQVDEDGDGRVNYKEFLQMMKSGDFSNRS
AtCML5	AT2G43290	MVRIFLLYNILNSFLLSLVPKKLRTLFPLSWFDKTLHKNSPPSPSTMLPSPSSSSAPTKRIDPSELKRVFQMFDKNGDGRITKEELNDSLENLGIYIPDKDLTQMIHKIDANGDGCVDIDEFESLYSSIVDEHHNDGETEEEDMKDAFNVFDQDGDGFITVEELKSVMASLGLKQGKTLDGCKKMIMQVDADGDGRVNYKEFLQMMKGGGFSSSN
AtCML6	AT4G03290	MDSTELNRVFQMFDKDGDGKITTKELNESFKNLGIIIPEDELTQIIQKIDVNGDGCVDIEEFGELYKTIMVEDEDEVGEEDMKEAFNVFDRNGDGFITVDELKAVLSSLGLKQGKTLEECRKMIMQVDVDGDGRVNYMEFRQMMKKGRFFSSLS
AtCML7	AT1G05990	MDPTELKRVFQMFDKNGDGTITGKELSETLRSLGIYIPDKELTQMIEKIDVNGDGCVDIDEFGELYKTIMDEEDEEEEDMKEAFNVFDQNGDGFITVDELKAVLSSLGLKQGKTLDDCKKMIKKVDVDGDGRVNYKEFRQMMKGGGFNSL
AtCML8	AT4G14640	MEETALTKDQITEFKEAFCLFDKDGDGCITVEELATVIRSLDQNPTEQELHDIITEIDSDSNGTIEFAEFLNLMAKKLQESDAEEELKEAFKVFDKDQNGYISASELSHVMINLGEKLTDEEVEQMIKEADLDGDGQVNYDEFVKMMINID
AtCML9	AT3G51920	MADAFTDEQIQEFYEAFCLIDKDSDGFITKEKLTKVMKSMGKNPKAEQLQQMMSDVDIFGNGGITFDDFLYIMAQNTSQESASDELIEVFRVFDRDGDGLISQLELGEGMKDMGMKITAEEAEHMVREADLDGDGFLSFHEFSKMMIAASY
AtCML10	AT2G41090	MANKFTRQQISEFREQFSVYDKNGDGHITTEEFGAVMRSLGLNLTQAELQEEINDSDLDGDGTINFTEFLCAMAKDTYSEKDLKKDFRLFDIDKNGFISAAEMRYVRTILRWKQTDEEIDEIIKAADVDGDGQINYREFARLMMAKNQGHDTKYDTTGGTLERDLAAGVAKNIIAAPMTDFIKNLFEALFS
AtCML11	AT3G22930	MEEIQQQQQQQQQQQQQQQQQQQQQQELTQEQIMEFKEAFCLFDKDGDGCITADELATVIRSLDQNPTEQELQDMITEIDSDGNGTIEFSEFLNLMANQLQETDADEELKEAFKVFDKDQNGYISASELRHVMINLGEKLTDEEVDQMIKEADLDGDGQVNYDEFVRMMMING
AtCML12	AT2G41100	MADKLTDDQITEYRESFRLFDKNGDGSITKKELGTMMRSIGEKPTKADLQDLMNEADLDGDGTIDFPEFLCVMAKNQGHDQAPRHTKKTMADKLTDDQITEYRESFRLFDKNGDGSITKKELRTVMFSLGKNRTKADLQDMMNEVDLDGDGTIDFPEFLYLMAKNQGHDQAPRHTKKTMVDYQLTDDQILEFREAFRVFDKNGDGYITVNELRTTMRSLGETQTKAELQDMINEADADGDGTISFSEFVCVMTGKMIDTQSKKETYRVVNQGQGQVQRHTRNDRAGGTNWERDIAVGVASNIIASPISDFMKDRFKDLFEALLS
AtCML13	AT1G12310	MGKDGLSDDQVSSMKEAFMLFDTDGDGKIAPSELGILMRSLGGNPTQAQLKSIIASENLSSPFDFNRFLDLMAKHLKTEPFDRQLRDAFKVLDKEGTGFVAVADLRHILTSIGEKLEPNEFDEWIKEVDVGSDGKIRYEDFIARMVAK
AtCML14	AT1G62820	MSKDGLSNDQVSSMKEAFMLFDTDGDGKIAPSELGILMRSLGGNPTESQLKSIITTENLSSPFDFNRFLDLMAKHLKTEPFDRQLRDAFKVLDKEGTGFVAVADLRHILTSIGEKLQPSEFDEWIKEVDVGSDGKIRYEDFIARMVAK
AtCML15	AT1G18530	MEDQIRQLKDIFDRFDMDADGSLTILELAALLRSLGLKPSGDQIHVLLASMDSNGNGFVEFDELVGTILPDLNEEVLINSEQLLEIFKSFDRDGNGFISAAELAGAMAKMGQPLTYKELTEMIKEADTNGDGVISFGEFASIMAKSAVDYFGLKINS
AtCML16	AT3G25600	MASTKPTDQIKQLKDIFARFDMDKDGSLTQLELAALLRSLGIKPRGDQISLLLNQIDRNGNGSVEFDELVVAILPDINEEVLINQEQLMEVFRSFDRDGNGSITAAELAGSMAKMGHPLTYRELTEMMTEADSNGDGVISFNEFSHIMAKSAADFLGLTAS
AtCML17	AT1G32250	MSHKVSKKLDEEQINELREIFRSFDRNKDGSLTQLELGSLLRALGVKPSPDQFETLIDKADTKSNGLVEFPEFVALVSPELLSPAKRTTPYTEEQLLRLFRIFDTDGNGFITAAELAHSMAKLGHALTVAELTGMIKEADSDGDGRINFQEFAKAINSAAFDDIWG
AtCML18	AT3G03000	MSCDGGKPAPAKLGDEQLAELREIFRSFDQNKDGSLTELELGSLLRSLGLKPSQDQLDTLIQKADRNNNGLVEFSEFVALVEPDLVKCPYTDDQLKAIFRMFDRDGNGYITAAELAHSMAKLGHALTAEELTGMIKEADRDGDGCIDFQEFVQAITSAAFDNAWG
AtCML19	AT4G37010	MSEAAQLRRGLKPKGKTYGLTNQKRREIREIFDLFDIDGSGSIDASELNVAMRSLGFEMNNQQINELMAEVDKNQSGAIDFDEFVHMMTTKFGERDSIDELSKAFKIIDHDNNGKISPRDIKMIAKELGENFTDNDIEEMIEEADRDKDGEVNLEEFMKMMKRTSYG
AtCML20	AT3G50360	MSSIYRTVSRKEKPRRHHGLTTQKKQEIKEAFELFDTDGSGTIDAKELNVAMRALGFEMTEEQINKMIADVDKDGSGAIDFDEFVHMMTAKIGERDTKEELTKAFQIIDLDKNGKISPDDIKRMAKDLGENFTDAEIREMVEEADRDRDGEVNMDEFMRMMRRTAYGGN
AtCML21	AT4G26470	MGGAVTKSETLQKEWVPETKLEAKIIEAVQRRASRGTTMKSFNSIVLKFPKIDDGLRNCKAIFQEFDEDSNGSIDHTELKNCIRKLEISFDEEEINDLFKACDINEDMGITFTEFIVLLCLVYLLKDDSSTLQKKWTMGMPKLEPTFETLVDTFVFLDENKDGYVSREEMVRAIDESGERSSGRIAMKRFEEMDWDKNGMVNFKEFLFAFTQWVGIDENEEEEEEDNNEKA
AtCML22	AT3G24110	MLCCCVNSENNKKYAELDAKLARKMVESRSIYPGHRSLKSMDSIIMKFPKLREGLRNIRSVFESYDNDTNGTIDIEELKKCLEELKLSLSDEEVKGLYSWCDVDGSKGIQFNEFIVLLCLIYLLAKPSSESSTESREMGPKLVESIFDPIVEVFLFLDKDGKGKLNKADVIKTLNNEDYPLERSPSHVTNMRFEEMDWGRKGKVGFREFLFAFMSWVGLDDADDDFMSS
AtCML23	AT1G66400	MSKNVSRNCLGSMEDIKKVFQRFDKNNDGKISIDELKDVIGALSPNASQEETKAMMKEFDLDGNGFIDLDEFVALFQISDQSSNNSAIRDLKEAFDLYDLDRNGRISANELHSVMKNLGEKCSIQDCQRMINKVDSDGDGCVDFEEFKKMMMINGSA
AtCML24	AT5G37770	MSSKNGVVRSCLGSMDDIKKVFQRFDKNGDGKISVDELKEVIRALSPTASPEETVTMMKQFDLDGNGFIDLDEFVALFQIGIGGGGNNRNDVSDLKEAFELYDLDGNGRISAKELHSVMKNLGEKCSVQDCKKMISKVDIDGDGCVNFDEFKKMMSNGGGA
AtCML25	AT1G24620	MFNKNQGSNGGSSSNVGIGADSPYLQKARSGKTEIRELEAVFKKFDVNGDGKISSKELGAIMTSLGHEVPEEELEKAITEIDRKGDGYINFEEFVELNTKGMDQNDVLENLKDAFSVYDIDGNGSISAEELHEVLRSLGDECSIAECRKMIGGVDKDGDGTIDFEEFKIMMTMGSRRDNVMGGGPR
AtCML26	AT1G73630	MANTNLESTNKSTTPSTDMELKKVFDKFDANGDGKISVSELGNVFKSMGTSYTEEELNRVLDEIDIDCDGFINQEEFATICRSSSSAVEIREAFDLYDQNKNGLISSSEIHKVLNRLGMTCSVEDCVRMIGHVDTDGDGNVNFEEFQKMMSSPELVKGTVANS
AtCML27	AT1G18210	MASANPETAKPTPATVDMANPEELKKVFDQFDSNGDGKISVLELGGVFKAMGTSYTETELNRVLEEVDTDRDGYINLDEFSTLCRSSSSAAEIRDAFDLYDQDKNGLISASELHQVLNRLGMSCSVEDCTRMIGPVDADGDGNVNFEEFQKMMTSSSLLNSNGSAAPPST
AtCML28	AT3G24110	MADATEKAEHDRIFKKFDANGDGKISAAELGDALKNLGSVTHEDIKRMMAEIDTDGDGYISYQEFIDFASANRGLMKDVAKIF
AtCML29	AT5G17480	MADATEKAEHDRIFKKFDANGDGKISAAELEEALKTLGSVTADDVKRMMAEIDTDGDGNISYQEFTDFAGANRGLMKDVAKIF
AtCML30	AT2G15680	MSNVSFLELQYKLSKNKMLRKPSRMFSRDRQSSGLSSPGPGGFSQPSVNEMRRVFSRFDLDKDGKISQTEYKVVLRALGQERAIEDVPKIFKAVDLDGDGFIDFREFIDAYKRSGGIRSSDIRNSFWTFDLNGDGKISAEEVMSVLWKLGERCSLEDCNRMVRAVDADGDGLVNMEEFIKMMSSNNV
AtCML31	AT2G36180	MAEIFESVDKNKDGKILWDEFAEAIRVFSPQITSEEIDKMFIVLDVDGDGQIDDVEFASCLMVNGGGEKDTEEEVVMKEAFDLYDMDGDGKISASEIHVVLKRLGEKHTMEDCVVMVQTVDKDSDGFVNFEEFKIMMNSNKESH
AtCML32	AT5G17470	MSVAEIFERVDKNKDGKISWDEFAEAIRAFSPSITSEEIDNMFREIDVDGDNQIDVAEYASCLMLGGEGNKEDEDIVMKEAFDLYDIDGDGKISASEIHVVLKRLGEKQTIAECIAMVRAVDADGDGFVSFEEFKTMMSCNNKKLQ
AtCML33	AT3G03400	MNNMSLSDIFERFDTSKDGKISWEEFRDAIHALSPSIPSEKLVEMFIQLDTNGDGQVDAAKFASCMDQTAQSSGGDVEKELKDAFKLYDINCDGKISANELHVVMTRLGEKCTVESCVGMVQAIDVDGDGYIRFVGV
AtCML34	AT3G03410	MSAKRVFEKFDKNKDGKLSLDEFREVALAFSPYFTQEDIVKFFEEIDVDGNGELNADEFTSCIEKMLKEVFVFCDVDGDGKIPASESYVTMTSLGKKFTEETSAEKVRAADVDGDGYLNFDEFMALVIGDI
AtCML35	AT2G41410	MKLAASLNRLSPKRLFRTKSKASVSRSEPSSFSSNASSSSSDGSYGNLKQGPTATPISVLPQNSGDFYTELVQAFKLIDRDDDGVVSRGDLAALISRLSHEPPSQEEVSLMLREVDGGDGGCISLEDLASRVAGTSGEGSVETEELREVFEIFDVDRNGKISAEELHRVFGVIGDERCTLEECMRMIATVDGNGDGFVCFDDFCRMMVPAMNDHHH
AtCML36	AT3G10190	MKLAKLIPKRFFIRSKDRSTVSKSPTAFSFGSASSSSGQDCKNSGGDGGGGSVTPTSILPEVPSPYSYVEILQAFKLIDRDNDGAVSRHDLESLLSRLGPDPLTEEEINVMLKEVDCDGDGTIRLEELASRVVSLDPARDSTELKETFEFFDADRDGLISADELLRVFSTIGDERCTLDDCKRMIADVDEDGDGFVCFTEFSRMMDLQR
AtCML37	AT5G42380	MTLAKNQKSSLSRLYKKVSSKRSESSRNLEDESRTSSNSSGSSSLNVNELRTVFDYMDANSDGKISGEELQSCVSLLGGALSSREVEEVVKTSDVDGDGFIDFEEFLKLMEGEDGSDEERRKELKEAFGMYVMEGEEFITAASLRRTLSRLGESCTVDACKVMIRGFDQNDDGVLSFDEFVLMMR
AtCML38	AT1G76650	MKNNTQPQSSFKKLCRKLSPKREDSAGEIQQHNSSNGEDKNRELEAVFSYMDANRDGRISPEELQKSFMTLGEQLSDEEAVAAVRLSDTDGDGMLDFEEFSQLIKVDDEEEKKMELKGAFRLYIAEGEDCITPRSLKMMLKKLGESRTTDDCRVMISAFDLNADGVLSFDEFALMMR
AtCML39	AT1G76640	MKNTQRQLSSSFMKFLEEKNRDLEAVFAYMDANRDGRISAEELKKSFKTLGEQMSDEEAEAAVKLSDIDGDGMLDINEFALLIKGNDEFTEEEKKRKIMEAFRMYIADGEDCITPGSLKMMLMKLGESRTTDDCKVMIQAFDLNADGVLSFDEFALMMR
AtCML40	AT3G01830	MKSENVNKRDEYQRVFSCFDKSHQGKVSVSTIERCVDAIKSGKRAVVDQEDTTNPNPEESTDDKSLELEDFVKLVEEGEEADKEKDLKEAFKLYEESEGITPKSLKRMLSLLGESKSLKDCEVMISQFDINRDGIINFDEFRAMMQ
AtCML41	AT3G50770	MATQKEKPSSNSFKWFSTKTLKLNLSFQNRRRSPKSNSSSTLNSPRSNSDDNNNIKSHQASKEELRQVFSHFDSDGDGKISAFELRHYFGSVGEYISHEAAQEAINEVDTDADGSLGFEDFVGLMTRRDLYGDGEVDGDGELKTAFEMFEVEKGSGCITPKGLQKMLVKLGESRTYGECEAMIKFYDIDGNGILDFHEFRQMMTV
AtCML42	AT4G20780	MESNNNEKKKVARQSSSFRLRSPSLNALRLQRIFDLFDKNGDGFITVEELSQALTRLGLNADLSDLKSTVESYIQPGNTGLNFDDFSSLHKTLDDSFFGGACGGGENEDDPSSAAENESDLAEAFKVFDENGDGFISARELQTVLKKLGLPEGGEMERVEKMIVSVDRNQDGRVDFFEFKNMMRTVVIPSS
AtCML43	AT5G44460	MEINNEKKKLSRQSSSFRLRSPSLNALRLHRVFDLFDKNNDGFITVEELSQALSRLGLDADFSDLKSTVDSFIKPDKTGLRFDDFAALHKTLDESFFGGEGSCCDGSPESDLEEAFNVFDEDGDGFISAVELQKVLKKLGLPEAGEIEQVEKMIVSVDSNHDGRVDFFEFKNMMQTVVVPS
AtCML44	AT1G21550	MDCSFITTNDLRRMFKTLDKNQDGLVTLDELLWILDKLGWAEHTPDELELIVGKQSLDLDEFLRFYYDAVLDSKGSKKNIDVVADNDEAIARAFNVFDVNGDGYISAEELRDVLERLGFEEEAKAWDCGRMIRVHDKNLDGFVDFEEFKNMILHV
AtCML45	AT3G29000	MESKSSSSSLPLFALFNFFLISFCRWVSSTRIFLSRFVPLLQHHQRVFDKKNNKDQQETLTKQEDDDDDDDDDDDDDDDDIDISREEAEMVMRSLGLFYNDDQLQEQYSAKEVSSLFEEKEASLEEVKQAFDVFDENKDGFIDAIELQRVLTILGFKQGSYLDNCLVMIRSLDGNKDGKIDFNEFVKFMETSFY
AtCML46	AT5G39670	MTENQLYSFITMKSSLSKCKQSSSLSFPLFGLINFFLIGFFRWVSFAQLFFSRFWPLVQHQQCVSEKKSKDLEFQTSIKHEEYRDDDDDGLCREDVGMVMKSLGLSTDQENEGLQKQYSSKEVSNLFEEKEPSLEEVKQAFDVFDENRDGFIDPIDLQRVLTILGLKQGSNLENCRRMIRSFDGSKDGRIDFYGFVKFMENNFC
AtCML47	AT3G47480	MEDSSLLSPISLLTIVIFLFILNLMMIIQDFSSSFPFRFHLFFSNAYILFTSIRNNKQNTELPIIKKVVVPNRADIKTSVEEVKAIIDDSEALYECLIEEGEEYLLEKNEMMGKEIVKEAFRLFDENQDGFIDENELKHVLSLLGYDECTKMECRKMVKVYDENRDGKIDFYEFVKLIEKSFS
AtCML48	AT2G27480	MSYSNAYAPSAPELPESFVQQQHDGESRYTYAYPSYQPTQQFSSYSGMFSPETHPEIVRSFESADRNRSGFLEESELRQALSLSGYDGISNRTIRLLLFIYKIPVDSLLRLGPKEYVELWNCLAQWRAIFNRYDRDRSGKMNSTQLRDAFYNLGCVLPTSVHQLIVSQFDDGTGKTVDLCFDSFLECGMIVKGLTEKFRENDPGYTGYATLSYDVFMLMVIPFIATYD
AtCML49	AT3G10300	MSGYPPSSQGYGYGGNPPPPQPPYGSTGNNPPPYGSSGSNPPPPYGSSASSPYAVPYGAQPAPYGAPPSAPYASLPGDHNKPHKEKPHGASYGSPSPGGYGAHPSSGPSDYGGYGGAPQQSGHGGGYGGAPQQSGHGGGYGAPPPQASYGSPFASLVPSAFPPGTDPNIVACFQAADRDNSGFIDDKELQGALSSYNQSFSIRTVHLLMYLFTNSNVRKIGPKEFTSLFFSLQNWRSIFERFDKDRSGRIDTNELRDALMSLGFSVSPVILDLLVSKFDKSGGRNRAIEYDNFIECCLTVKGLTEKFKEKDTALSGSAIFNYENFMLTVLPFLVA
AtCML50	AT5G04170	MSGYPPTSQGYGYGYGGGNQPPPPQPPYSSGGNNPPYGSSTTSSPYAVPYGASKPQSSSSSAPTYGSSSYGAPPPSAPYAPSPGDYNKPPKEKPYGGGYGAPPPSGSSDYGSYGAGPRPSQPSGHGGGYGATPPHGVSDYGSYGGAPPRPASSGHGGGYGGYPPQASYGSPFASLIPSGFAPGTDPNIVACFQAADQDGSGFIDDKELQGALSSYQQRFSMRTVHLLMYLFTNSNAMKIGPKEFTALFYSLQNWRSIFERSDKDRSGRIDVNELRDALLSLGFSVSPVVLDLLVSKFDKSGGKNRAIEYDNFIECCLTVKGLTEKFKEKDTAYSGSATFNYESFMLTVLPFLIA
CsCML1	Csa_7G073720	MPINPNFLELQYNVSKKKFLREPSRLFSFKDRQSSGLRRALQPSSEEIKQIFNKFDTNKDGRISKHEYRGILKALGRGNSMEEVQKIFRAVDSDGDGYINLNEFMEVHRSGGGVQAKEVEFAFKTFDLNGDRKISAEEVMRVLKGLGEKCSIEDCRRMVRAVDSDGDGMVDINEFMTMMTRSAK
CsCML2	Csa_6G076830	MFNLTSSLFPTFFHRNISSKPFFQKSLNNQKLPSFTTFNHFQLLFNLLDSDGDGKISTKELSQFLYRLGYKKLKATMEAEEMVKEMDSDRDGFIEMDEFLEVLQKGEEEEEILREAFLIFDGDKNGLICAEKLKRTLSKFGWQKCDLKQCKKMIEGVDHDGDGYVNFQDFRLMMTQKR
CsCML3	Csa_6G376250	MPPISSKDLHRIFKKLDKNCDGLICLQELNWLLDSIGIQLTMEELESFLERPSLDFDEFLFFYESISKQNKGECKGGVAGCVQDNDNDQGQDDMEIVYLAFKVFDMNGDGFISCDELENVLVKLELWDASRSDVDYCRSMIRAYDTNLDGKLDFEEFKNMMLLTT
CsCML4	Csa_5G173500	MSPTISSEDLYRIFKKLDKNGDGLICLQELKWLFDRVGVELTMEELESFLEKPSLDFDQFLFCYKSISKQNKGECEEEDVLGCLEEDDHEEDMEMICMAFKVFEMSDDDGFISCDGLENVLARLNEYDQRLQQSERQRKVEVQALKHQIMELENRFEDRFKTIMTEMHKRHVSS
CsCML5	Csa_5G561760	MGFKSLFSRKKKSHSSTDSPLGSTTLPILGSRTQIAELEQVFNKFDVNGDGKICSSELGSIMGSLGQPATEEELQNMIKEVDADGDGYIDLDEFIELNTKGVDSDEVLENLKDAFSVYDIDGNGSITAEELHEVLKSLGDDCSLADCRKMITGVDKNGDGMISFDEFKVMMMSGSRSQGFNG
CsCML6	Csa_5G571560	MDKLSPYHTLLFYNIDTDSDGKVSPHDLLTRLPALTGQVLTEAEAASAVAAFDSDGDGLLGMEEFGRLVEGVVVGGDDDDREVREAFQMYEMEGLGVITPVSLRRMLSRLGESRSVGDCKRMIAKFDLDGDGVLCFDEFRGMMLL
CsCML7	Csa_5G608150	MASIQSDHQLKQLHDIFRRFDMNSDGSLTQLELGALLRSLGIKPSGDQLHSLLSNMDSNGNGSIEFDELVNAILPDMNDDILVNQEQLMEVFRSFDRDGNGYITAAELAGSMAKMGHPLTYRELSDMMRQADTDGDGVISFNEFTTVMAKSAADFLGLTFA
CsCML8	Csa_5G627080	MGFRSLFRKKKPFSSVNSPLVSSSSTLGSRSSLDDSESQITELEEVFKKFDVNGDGKISSAELGSIMRSLGHNATEEELGKMIDEFDADGDGFINLHEFVELNTKEIDPEELLENLREAFSVYDIDGNGSISAEELHKVLQSLGDDCSVADCRQMISGVDSNGDGMISFEEFKVMMSTGLSVAGS
CsCML9	Csa_5G636620	MMNLGLYNVSMDDKSTPQNPSFRFLLIIDFLRFQNLASWLCSSTSTKLKQSTPPASSKSVESRAEERLVSTEEMKWVMGNLGIDCSEGSSVPLFGSAEEVAEMFDQTAASVAEVKQAFGVFDVNGDGFIDVEELQRVMCVLGFKEGEGIENCEKMIRKFDSNKDGRIDFEEFVKLMEAVV
CsCML10	Csa_4G355130	MMKIPKRFSPKRLFRSKKHHSADVSRSDPPSFGSGTSSSSSSSENFFKANTVNTGYGTPTSVLDSDGRGNEGVVSRKELEAILSRIASEEEVAMMLREVDSGGDGFIRLEELMARVGSGEAAGESEMRETFEFFDADQDGRITAEELHGVFRSIGDERCTLEDCGRMIRDVDENGDGFVCFAEFVRMMELQR
CsCML11	Csa_4G376140	MAQAGSLLVDTEALSHIFNLIEAFRAFDADNDGLISSAEVGGIMGSLGYNLSEEDVNMMMEEGDADKDGLLSMGEFLEMNAKNMDVGELGSYLKIALEALKADEDDLVSGEELYDVFVNLGLDVSLEDSMAIVASIDGDGDGAMFLHDFKLIVNSLH
CsCML12	Csa_4G639730	MSRKSKNYYPRAKLSREQLLLIFRNHDSDKDGRLSTTELTEAFRYIGAFLPTYRARHALLHADSDRDGFIGEKDFESLVNYAEQRQYTII
CsCML13	Csa_4G639740	MALSFVFSNGVSDYKRCPVPFSRDQLRDIFLKHDGDGDGRLSRLELKSAFESLGSNWSRFRARQSLKAADADGDGYVTLDELDRLLDYAVRCEYAII
CsCML14	Csa_3G008850	MSNKQPIKLDDEQIAELREIFRSFDRNNDGSLTQLELGSLLRSLGLKPSPDQLESLIMKADTNSNGLVEFSEFVALVEPELVSAKCPYTEEQLKQLFRMFDRDGNGFITAAELAHSMAKLGHALTAEELTGMIREADTDGDGRINFQEFSQAITSAAFDNSWA
CsCML15	Csa_3G036390	MGKDLSDDQKSSMREAFTLFDTDGDGRIAPSELGILMRSLGGNPTQAQLKAIIAEENLTSPFDFNRFLDIMSKHMKPEPFDRQLRDAFKVLDKDNTGYVRVSELRHILTSIGEKLEPSEFDEWIREVEVGSDGSIRYEDFIARMVAK
CsCML16	Csa_3G061000	MGSVVGKLESPRECVPETKLEAKMVETMKQRATKGSIIRSFDCIILKFPKIDDSLRNCKTIFQQFDEDLNGIIDRRELKKCFDGLEILLTEEEIDDLFDACDISTAMGMKFNEFIVLLCLVYLLKDDPNAVFSKSQFGMPKLEQTFESLVDAFVFLDKNKDGYVSKSEMVSAINETTSGERSSGRIAMRRFEEMDWDKNGMVNFKEFLFAFTRWVGIDENEDGEEEEEE
CsCML17	Csa_3G130890	MSKVGSIFFCCSSSNKYNRLDAKLGRKMVEVKRNSAGHDNFKSLNGIILRFPQFKEGLQNIRGVFEQYDEDSNGSIDREELKKCLQQLQMHMTEEEVEDLFHSCDIDGSAGIQFNEFIVLLCLIYLLKDEHSLTKSKLGSPQLEATFDTIIQAFIFLDKNGDGKLNRKEMVKALNEASPYERSPARITKTRFKEMDWNNSGKVNFREFLFGFINWVGVDTDDDLSPT
CsCML18	Csa_3G144210	MTEVLSEEQIVEFKEAFCLFDKDGDGCITIEELATVIRSLDQNPTEEELQDMIKEVDVDGNGTIEFAEFLNLMAKKIKETDAEEELKEAFKVFDKDQNGYISATELRHVMINLGEKLTDDEVEQMIKEADLDGDGQVNFEEFVKMMMAVG
CsCML19	Csa_3G319280	MAKNNSLSISTPGSSALGSMDEIIRVFNKFDKNGDGKISVTELAAALGELSGNISTDEIHRIMSEIDKDGDGFIDLDEFTDFTSSSTGGNKDLQDAFDLYDIDKNGLISAKELHSVLKRLGEKCSLKDCCRMISSVDVDGDGHVNFEEFKKMMTRS
CsCML20	Csa_3G345360	MADSGVNSADLERIFKRFDANGDGKISATELGDALNEFGVSSEDAKRMMDAIDKDGDGYISFQEFFDFAKDNRALMKDFAKAF
CsCML21	Csa_3G588520	MEKPRCYKRVFEHFDSDGDGKISPSELRECIAVVSGEKLSVLEAQEAVAEFDSDGDGQLKEEDFVRFVDGGGEEERVKELREAFKMYEMKGSGLITAESLRRMLRKLGETKSLRDCTAMIAKFDIDGDGVLSFDEFRVMMS
CsCML22	Csa_3G727960	MEAVASDVPRPRLTKKPSSLSSSFRLRCPSLNSLRLRRIFDMFDKNGDGMITTDELGQALGLLGLDADESELDSTVNSFIEPGNEGLRFEDFAALHQSLNDTYFGGMVEDEDEDEKRETSMSSMSQEESDLSEAFRVFDEDGDGYISATELQVVLRKLRLAEGNEIDRVQKMILSVDRNQDGRVDFFEFKDMMRSVIVRSC
CsCML23	Csa_3G823060	MKLLKSLNPNRLFSSKSHRSKLSRSQPPSFGSASSSSSSSAAGTPTSVLPSLDWSDFSDPTLSRKELKALLGLIGAEPPSEEEIKIMMGEMDRVGPTCHSELRDTFEIFDADHDGRITAEELFSVFAAMGDDGCTLEDCQRMIAGVDKNGDGFVCFDDFVRMMDCQR
CsCML24	Csa_3G825010	MFFRLEYYLITMETRLTDIKSVQLDPSPFVFVDRISILPILFNFADRIQELVRSLPWPILQPHSKEKALSQCNCSSKSGDQIIITTQQNCSSMSREEVRFVMEKLELFWREERDGGGGDKGIGESDEMIRGMFEENEPSLEELKQTFNVFDRNRDGFIDEHELFIVLSLLESNKGIFIHDCKTMIARFDLNNDGKIDFHEFVKFMEVALS
CsCML25	Csa_3G854250	MAISSIAVIPFKWFTKTNFKLNFPLLHSKHKPTSSKPSTSGPGPRPLAEVAFRHLDVDGDGKISCNELQSYFASIGEYMTWNDARSVIGDFDRDGDELLELGDFERMVKGEEEEEEDLKRAFEMFEGEKGCGFIEATGLQKMFGRLGYVKSKEECMAMIKVFDVDGDGVIDYHEFLRMMT
CsCML26	Csa_2G007990	MEPIFNFLLLSVLFVAGFINFLLYFPSKRFSAWFQSIKPSSQITHFKSTPLQPPPPPSPSPSPSPPPPSAMEMKKVFGTFDKNDDGFITKKELMESLKSMRMMITEKDAEEMLKGVDENGDGLIDFEEFCVLGGKLMMGFEENKKTSVEDEEDELKDAFGVFDKDSDGLISVEELSLVLCSLGMNEGKIVENCKEMIRKVDLDGDGMVNFDEFKKMMRNGVTILTSS
CsCML27	Csa_2G011480	MSEEQIISEFQEAFCLLDKDGDGCITINELATAIRSLHHNPTEEELQIMMNEVDVNGNGYIEFGEFFNLMAKKMKENEAEDELREAFKVFDMDDDGKISPNELKNVMIHMVEKLTDEEIEQMVNEADLDGDGLIDYEEFVKMMLLI
CsCML28	Csa_2G215510	MGEALTKEQMDQLKEAFFLFDKNKDGRITIDELRAEIRNLGHNPTEEELKEMIREVDADGNGTIEFGEFQNLMSKIMKEETEKKLKEAFKVFDKNQDGYISANELSHVYWMLNSGEEKLTDEEVFHMISEADLNGDGHVDYHEFVKIMTQDVSQILPESGFF
CsCML29	Csa_2G286440	MASLYRGVSRKEKPKGRHGLTPQKKQEIKEAFELFDTDGSGTIDAKELNVAMRALGFEMTEEQIKQMIADVDKDGSGAIDYDEFEYMMTAKIGERDTKEELTKAFDIIDYDKNGKISGNDIKRIAKELGEVFTDKDIQEMIDEADRDRDGEVNVDDFFRMMRRTTYGS
CsCML30	Csa_2G286450	MSSLLKLFRSCSGKRPSKNTSFSIPIKERSNSSSPSSKHFRPNLEEIKWAFEKFDSNKDGKISFEEYKEAHRGLAGSKEITDAEAEKSFKLVDVDGDGFVDLKEFVELYTMSSGEVKVGDIESAFKVYDSNGDGKISAEEVMGIMKILGENTTLKACKQMVKGVDMDGDGFIDVQEFSKLMGKYSSKFQN
CsCML31	Csa_2G357350	MGTSNGLIFKCFPASLTEFEVAKVFKNHDKDGDGRLTKEELKSAFKYLGYKFTTFRVHQALHAADDNCDDVISFEEMSKLIMYTAGS
CsCML32	Csa_2G357850	MGNKYSSLSEEQLAWIFKKHDIDRDRKLTKEELTRAFNYLGSRWTALRVKEAIRAVDANHDGVISLDEMSKLIVYVKGCRT
CsCML33	Csa_2G358880	MEEKSLFVALQKPLSEKEANLLLEMRDANGDGVLDKQELMADLTHTNKKPSTSLQDMKLTREEIKEIFVGFDIDGDGFLSKNEVIQAFGMMGSCSPIMKAHYAMACADEDGDGRISEPELNKLIDYVQRTINRRRLN
CsCML34	Csa_2G359910	MSVSRSQLNLSRDEMIKKIFEEYDVDGDGTLTKQEVMQAMDAMGFKILFQMTQFGISFADRDDDGKVDQDELEKLIDCVIRFQTRKRVCRRPVNSTEKTR
CsCML35	Csa_2G359930	MSTNPLKDQPVPAQGNYMSEQEASNLIKKYDKNGDSILTKDELTALIIEQAASHHHQQIKPQKVEPKVNIPDEKASCGPYKMRLSKDEMREIFLEHDIDGDGYLTRSELVKAFNMCGSFNSFSKANYALNLADANGDGFICLDELDKVLEYADRVINKTKK
CsCML36	Csa_2G359940	MALPGVSKFNFSREEMKEIFREHDIDGDGYLSISELIKAMGFLGHSIPFYKAHYGMAYCDENGDGLISEDELDKLIDYAERFQKRRR
CsCML37	Csa_2G359950	MSVSHLQAWAKNEANELIKKYDRNGDGVLTKEELQSFLRDARGSTQLNNIRNVSSSTVPKTNENLAQKVSSNTCITPKKQLLDKAQGSSKQSNVPLSREQIKEIFKYHDSNKDGFLSIRELTKAFSSMGSIVPFCKARYAMAYADVDEDGLVSEAELDKLIDYAHKIIKKK
CsCML38	Csa_2G376820	MGISRFIGDFLQTLGGRSRAAVESTIDAGESKPNRMVYDDVLLRALITVFGMRENGRIKTEKAKGVVEKLGLIEEKEKFELAAGEGGDEVAVEEMIGEEEGKRNELLYEAFKIFDVDGDGFIDTIELKRVIDCLGLDKGWGIREIEKMVSVVDVNLDGKVDFSEFELMMGVKCL
CsCML39	Csa_2G406780	MDKIALYEKVFKQVDGDGDGKLSPPELQRCILGVGGSLTIEEAETVVEKLDSDGDGLVGWDEFVEFVEGVGEEEKVNDLKEAFRMYEMDGCGFITTKSLKRMLSKLGESRSIDDCKKMIAKFDLDSDGVLNFDEFKFMMS
CsCML40	Csa_1G002110	MEIVKSGAQYDRVLSYFDEDGDGKISPSELRNRLGLIGGELQQAEAEAAVESLDSDGDGLLCVGDIERLLEVGEEEKLKDLKEAFALYDSEGCGFITPKNLKKMLRKLGERKSTEECKMMIRRFDLNGDGLISFEEFQIMMA
CsCML41	Csa_1G015780	MAALAVEQLNQLRDIFARFDMDSDGSLTILELAALLRSLGLKPSGDQIHVLLANMDSNGNGSVEFDELVTAIMPDFNEEVMVNQTQLLEVFRSFDRDGNGYITAAELAGSMAKMGQPLTYRELTEMMKEADTDGDGVISFNEFASVMAKSAADFLGLAIS
CsCML42	Csa_1G025020	MATDPNPIPTSKSEADQIAKQNPSVLLQDDEELRKVFERFDANGDGKISISELDAVLTSLTLKSAIPLEELRSVMDDLDSDKDGYINIDEFAAFCKKPMASDEAGAAELRDAFDLYDQDRNGLISQSELHLVLNRLGISCSKEDCQKMINSVDSDGDGNVNFEEFRKMMTDNSKSKAAQQNGTAAAAP
CsCML43	Csa_1G033260	MEPIDVVDYTNPISVFHILFLFFLNFILGRFFPGLFNIFILSAAFIFYLWNSWVAQRSIITPSVRRNDHEEHCCCTKIVGMLVNDKRVEQAKLSIEDVKTMMEVLDHEHNNNNRDSDSDNLELEGMFEEEVSLGEVKEAFDLFDENGDGFIDAEDLKKVLCGLGLITVGSDIDECKRMLSGFDNDGDGRLDFEEFAKLVEQSFC
CsCML44	Csa_1G164670	MASFFNRFTSYSNSSSNSNSNSHAPSAPSPPSAPETQGQEHSHATASPYHSEQNQPQPYGFNYGGVSSYGSYGFPPGTSPEVIRSFQMVDRDRSGFIDENELQQALSSGYQRFSLRTVRLLIFLFRNPIDSSRMGPNEFTALWNCLGQWRGMFERYDRDRSGRIDALEMRDALYGLGYAVPSSVLQLLISLYDDRSGQQVEFNFDSFVECGMIVKGLTEKFKEKDRNYTGSATLTYEDFMSTILPFLVSYS
AtCaM2	AT2G41110	MADQLTDDQISEFKEAFSLFDKDGDGCITTKELGTVMRSLGQNPTEAELQDMINEVDADGNGTIDFPEFL NLMARKMKDTDSEEELKEAFRVFDKDQNGFISAAELRHVMTNLGEKLTDEEVDEMIKEADVDGDGQINYE EFVKVMMAK
