# Supplementary material for: Genome-wide identification and expression analysis of calmodulin-like proteins in cucumber
Source: PeerJ. 2023 Jan 13;11:e14637. doi: 10.7717/peerj.14637 (PMC9841910; doi:10.7717/peerj.14637)
Supplement: Supplemental Information 3 [file peerj-11-14637-s003.xlsx]

## Sheet: Sheet1
Data S2. Cis-acting elements in promotor of CsCML gene members
Gene name	Gene ID	Cis-element name	Sequence	Location	Function
CsCML1	KGN43936	MRE	AACCTAA	1102	light responsive element
		G-box	CACGTC	221	light responsive element
		GT1-motif	GGTTAA	667	light responsive element
		HD-Zip 1	CAAT(A/T)ATTG	497	palisade mesophyll cells
		circadian	CAAAGATATC	1175	circadian control
		ABRE	ACGTG	221	ABA responsiveness
		ARE	AAACCA	126	anaerobic induction
		TGACG-motif	TGACG	1077	MeJA responsiveness
		CGTCA-motif	CGTCA	1077	MeJA responsiveness
		TCA-element	CCATCTTTTT	333	SA responsiveness
		TC-rich repeats	GTTTTCTTAC	229	defense and stress responsiveness
CsCML2	KGN46235	TGACG-motif	TGACG	387	MeJA responsiveness
		CGTCA-motif	CGTCA	387	MeJA responsiveness
		TC-rich repeats	ATTCTCTAAC	535	defense and stress responsiveness
		CAT-box	GCCACT	1383	meristem expression
		MBS	CAACTG	1372	drought-inducibility
		ABRE	ACGTG	385	ABA responsiveness
		G-box	CACGTC	385	light responsive element
		ARE	AAACCA	724	anaerobic induction
CsCML3	KGN47684	Sp1	GGGCGG	555	light responsive element
		G-Box	CACGTT	304	light responsive element
		ABRE	ACGTG	305	ABA responsiveness
		ARE	AAACCA	839	anaerobic induction
		MBS	CAACTG	576	drought-inducibility
		MSA-like	(T/C)C(T/C)AACGG(T/C)(T/C)A	1726	cell cycle regulation
		circadian	CAAAGATATC	1272	circadian control
		WUN-motif	AAATTTCCT	260	wound-responsive
CsCML4	KGN50423	ARE	AAACCA	466	anaerobic induction
		TGA-element	AACGAC	117	Auxin responsiveness
		G-box	CACGAC	897	light responsive element
		AAAC-motif	CAATCAAAACCT	880	light responsive element
		MRE	AACCTAA	287	light responsive element
		GT1-motif	GGTTAA	1402	light responsive element
		TC-rich repeats	ATTCTCTAAC	107	defense and stress responsiveness
		P-box	CCTTTTG	715	GA responsiveness
		RY-element	CATGCATG	300	seed-specific regulation
		TCA-element	CCATCTTTTT	1171	SA responsiveness
		MSA-like	(T/C)C(T/C)AACGG(T/C)(T/C)A	1793	cell cycle regulation
CsCML5	KGN51467	ABRE	ACGTG	1447	ABA responsiveness
		ABRE	AACCCGG	1452	ABA responsiveness
		G-box	CACGTC	1447	light responsive element
		GT1-motif	GGTTAAT	1114	light responsive element
		O2-site	GATGATGTGG	343	zein metabolism regulation
		TGACG-motif	TGACG	370	MeJA responsiveness
		CGTCA-motif	CGTCA	370	MeJA responsiveness
		ARE	AAACCA	520	anaerobic induction
		TCA-element	CCATCTTTTT	1953	SA responsiveness
CsCML6	KGN51513	ARE	AAACCA	44	anaerobic induction
		TGA-element	AACGAC	650	Auxin responsiveness
		O2-site	GATGACATGG	1945	zein metabolism regulation
		ABRE	ACGTG	1703	ABA responsiveness
		GT1-motif	GGTTAA	463	light responsive element
		G-Box	CACGTT	1702	light responsive element
		TCA-element	CCATCTTTTT	1170	SA responsiveness
		TC-rich repeats	GTTTTCTTAC	1266	defense and stress responsiveness
		CAT-box	GCCACT	1339	meristem expression
		TGACG-motif	TGACG	382	MeJA responsiveness
		CGTCA-motif	CGTCA	382	MeJA responsiveness
CsCML7	KGN52027	MBS	CAACTG	49	drought-inducibility
		GCN4_motif	TGAGTCA	1023	endosperm expression
		CAT-box	GCCACT	829	meristem expression
		LTR	CCGAAA	118	low-temperature responsiveness
		TC-rich repeats	ATTCTCTAAC	1401	defense and stress responsiveness
		TCA-element	CCATCTTTTT	1520	SA responsiveness
		G-Box	CACGTT	1398	light responsive element
		GT1-motif	GGTTAAT	762	light responsive element
		MRE	AACCTAA	903	light responsive element
		ABRE	ACGTG	1398	ABA responsiveness
		HD-Zip 1	CAAT(A/T)ATTG	797	palisade mesophyll cells
		ARE	AAACCA	898	anaerobic induction
		O2-site	GATGATGTGG	1614	zein metabolism regulation
		GARE-motif	TCTGTTG	937	GA responsiveness
		circadian	CAAAGATATC	578	circadian control
CsCML8	KGN52351	3-AF1 binding site	TAAGAGAGGAA	1429	light responsive element
		G-Box	CACGTT	128	light responsive element
		CGTCA-motif	CGTCA	311	MeJA responsiveness
		TGACG-motif	TGACG	311	MeJA responsiveness
		ARE	AAACCA	73	anaerobic induction
		ABRE	ACGTG	129	ABA responsiveness
		CAT-box	GCCACT	666	meristem expression
CsCML9	KGN52470	ACE	CTAACGTATT	502	light responsive element
		G-Box	CACGTT	65	light responsive element
		TGACG-motif	TGACG	468	MeJA responsiveness
		CGTCA-motif	CGTCA	468	MeJA responsiveness
		TCA-element	CCATCTTTTT	692	SA responsiveness
		ABRE	ACGTG	65	ABA responsiveness
		ARE	AAACCA	1318	anaerobic induction
CsCML10	KGN54524	MRE	AACCTAA	431	light responsive element
		ABRE	ACGTG	833	ABA responsiveness
		GARE-motif	TCTGTTG	289	GA responsiveness
		P-box	CCTTTTG	1550	GA responsiveness
		ARE	AAACCA	50	anaerobic induction
		MBS	CAACTG	217	drought-inducibility
		MSA-like	(T/C)C(T/C)AACGG(T/C)(T/C)A	183	cell cycle regulation
		TCA-element	CCATCTTTTT	306	SA responsiveness
		G-Box	CACGTT	832	light responsive element
		TC-rich repeats	GTTTTCTTAC	1768	defense and stress responsiveness
CsCML11	KGN54599	GCN4_motif	TGAGTCA	607	endosperm expression
		G-Box	CACGTT	118	light responsive element
		circadian	CAAAGATATC	383	circadian control
		ABRE	ACGTG	119	ABA responsiveness
		O2-site	GATGACATGG	1174	zein metabolism regulation
CsCML12	KGN55185	3-AF1 binding site	TAAGAGAGGAA	1966	light responsive element
		GT1-motif	GGTTAA	1421	light responsive element
		TGACG-motif	TGACG	1786	MeJA responsiveness
		CGTCA-motif	CGTCA	1786	MeJA responsiveness
		ARE	AAACCA	1047	anaerobic induction
		HD-Zip 1	CAAT(A/T)ATTG	448	palisade mesophyll cells
CsCML13	KGN55186	circadian	CAAAGATATC	777	circadian control
		ABRE	ACGTG	1053	ABA responsiveness
		ARE	AAACCA	1075	anaerobic induction
		TGA-element	AACGAC	1283	Auxin responsiveness
		O2-site	GATGATGTGG	1935	zein metabolism regulation
		AAGAA-motif	gGTAAAGAAA	1847	MeJA responsiveness
		CGTCA-motif	CGTCA	1847	MeJA responsiveness
		GT1-motif	GGTTAA	558	light responsive element
		G-Box	TCCACATGGCA	697	light responsive element
		RY-element	CATGCATG	1272	seed-specific regulation
CsCML14	KGN55728	MBS	CAACTG	1695	drought-inducibility
		G-Box	CACGTT	1634	light responsive element
		GT1-motif	GGTTAAT	977	light responsive element
		MRE	AACCTAA	980	light responsive element
		TATC-box	TATCCCA	891	GA responsiveness
		TGA-element	AACGAC	1618	Auxin responsiveness
		ARE	AAACCA	396	anaerobic induction
		ABRE	ACGTG	1239	ABA responsiveness
CsCML15	KGN55913	TGACG-motif	TGACG	1917	MeJA responsiveness
		CGTCA-motif	CGTCA	1917	MeJA responsiveness
		GCN4_motif	TGAGTCA	1272	endosperm expression
		SARE	TTCGACCATCTT	1501	SA responsiveness
		TCA-element	CCATCTTTTT	1040	SA responsiveness
		circadian	CAAAGATATC	91	circadian control
		CAT-box	GCCACT	144	meristem expression
		P-box	CCTTTTG	607	GA responsiveness
		AuxRR-core	GGTCCAT	1143	Auxin responsiveness
		G-Box	CACGTT	1787	light responsive element
		3-AF1 binding site	TAAGAGAGGAA	1946	light responsive element
		MRE	AACCTAA	1981	light responsive element
		ABRE	ACGTG	1787	ABA responsiveness
		ARE	AAACCA	1184	anaerobic induction
		O2-site	GATGA(C/T)(A/G)TG(A/G)	1475	zein metabolism regulation
CsCML16	KGN56046	ABRE	ACGTG	1222	ABA responsiveness
		ARE	AAACCA	300	anaerobic induction
		TGA-element	AACGAC	729	Auxin responsiveness
		O2-site	GATGA(C/T)(A/G)TG(A/G)	1305	zein metabolism regulation
		GT1-motif	GGTTAA	590	light responsive element
		G-Box	CACGTT	1221	light responsive element
		CGTCA-motif	CGTCA	868	MeJA responsiveness
		TGACG-motif	TGACG	868	MeJA responsiveness
		TCA-element	CCATCTTTTT	157	SA responsiveness
		TC-rich repeats	ATTCTCTAAC	1487	defense and stress responsiveness
		P-box	CCTTTTG	1660	GA responsiveness
CsCML17	KGN56734	TGACG-motif	TGACG	1153	MeJA responsiveness
		CGTCA-motif	CGTCA	1153	MeJA responsiveness
		P-box	CCTTTTG	14	GA responsiveness
		GARE-motif	TCTGTTG	895	GA responsiveness
		TC-rich repeats	GTTTTCTTAC	135	defense and stress responsiveness
		GT1-motif	GGTTAA	732	light responsive element
		G-box	CACGTC	1433	light responsive element
		ACE	CTAACGTATT	632	light responsive element
		ARE	AAACCA	909	anaerobic induction
		ABRE	ACGTG	1434	ABA responsiveness
CsCML18	KGN56931	ARE	AAACCA	815	anaerobic induction
		O2-site	GATGACATGG	1710	zein metabolism regulation
		CGTCA-motif	CGTCA	547	MeJA responsiveness
		TGACG-motif	TGACG	547	MeJA responsiveness
		GT1-motif	GGTTAA	111	light responsive element
		TCA-element	CCATCTTTTT	115	SA responsiveness
CsCML19	KGN57816	MRE	AACCTAA	75	light responsive element
		TGA-element	AACGAC	220	Auxin responsiveness
		ARE	AAACCA	1921	anaerobic induction
		P-box	CCTTTTG	722	GA responsiveness
		TC-rich repeats	GTTTTCTTAC	1949	defense and stress responsiveness
		MBSI	aaaAaaC(G/C)GTTA	195	flavonoid biosynthetic genes regulation
CsCML20	KGN57835	GT1-motif	GGTTAA	424	light responsive element
		CGTCA-motif	CGTCA	1376	MeJA responsiveness
		TGACG-motif	TGACG	1376	MeJA responsiveness
		ARE	AAACCA	140	anaerobic induction
		GARE-motif	TCTGTTG	1354	GA responsiveness
CsCML21	KGN58193	G-Box	CACGTT	1220	light responsive element
		GT1-motif	GGTTAAT	395	light responsive element
		MRE	AACCTAA	1380	light responsive element
		CAT-box	GCCACT	477	meristem expression
		circadian	CAAAGATATC	1936	circadian control
		ABRE	ACGTG	1221	ABA responsiveness
		ARE	AAACCA	445	anaerobic induction
CsCML22	KGN58678	ATCT-motif	AATCTAATCC	1987	low-temperature responsiveness
		TC-rich repeats	ATTCTCTAAC	73	defense and stress responsiveness
		GT1-motif	GGTTAAT	846	light responsive element
		AuxRR-core	GGTCCAT	1688	Auxin responsiveness
		O2-site	GATGACATGG	1713	zein metabolism regulation
CsCML23	KGN59507	RY-element	CATGCATG	457	seed-specific regulation
		P-box	CCTTTTG	1116	GA responsiveness
		G-box	TACGTG	1475	light responsive element
		GT1-motif	GGTTAA	1623	light responsive element
		MRE	AACCTAA	1053	light responsive element
		ARE	AAACCA	726	anaerobic induction
		ABRE	ACGTG	1475	ABA responsiveness
CsCML24	KGN59556	ARE	AAACCA	1612	anaerobic induction
		MRE	AACCTAA	852	light responsive element
		TCA-element	CCATCTTTTT	980	SA responsiveness
		CGTCA-motif	CGTCA	341	MeJA responsiveness
		TGACG-motif	TGACG	341	MeJA responsiveness
		P-box	CCTTTTG	1277	GA responsiveness
		LTR	CCGAAA	399	low-temperature responsiveness
CsCML25	KGN59929	ABRE	TACGGTC	906	ABA responsiveness
		G-box	CACGAC	204	light responsive element
		AAAC-motif	CAATCAAAACCT	1150	light responsive element
		GT1-motif	GGTTAA	1634	light responsive element
		ARE	AAACCA	227	anaerobic induction
		O2-site	GATGACATGG	168	zein metabolism regulation
		MBSI	aaaAaaC(G/C)GTTA	1733	flavonoid biosynthetic genes regulation
		LTR	CCGAAA	284	low-temperature responsiveness
		TC-rich repeats	GTTTTCTTAC	676	defense and stress responsiveness
		P-box	CCTTTTG	154	GA responsiveness
		TGACG-motif	TGACG	545	MeJA responsiveness
		CGTCA-motif	CGTCA	545	MeJA responsiveness
		WUN-motif	AAATTTCCT	1841	wound-responsive
CsCML26	KGN60706	MRE	AACCTAA	1315	light responsive element
		G-Box	TCCACATGGCA	482	light responsive element
		ACE	CTAACGTATT	1647	light responsive element
		TGACG-motif	TGACG	737	MeJA responsiveness
		CGTCA-motif	CGTCA	737	MeJA responsiveness
		TCA-element	CCATCTTTTT	699	SA responsiveness
		ABRE	ACGTG	1307	ABA responsiveness
CsCML27	KGN60815	G-box	TACGTG	117	light responsive element
		ACE	CTAACGTATT	851	light responsive element
		ABRE	ACGTG	101	ABA responsiveness
		ARE	AAACCA	15	anaerobic induction
		TCA-element	CCATCTTTTT	1581	SA responsiveness
		LTR	CCGAAA	336	low-temperature responsiveness
CsCML28	KGN61657	MSA-like	(T/C)C(T/C)AACGG(T/C)(T/C)A	1021	cell cycle regulation
		TGACG-motif	TGACG	904	MeJA responsiveness
		G-Box	CACGTT	405	light responsive element
		GT1-motif	GGTTAAT	190	light responsive element
		CGTCA-motif	CGTCA	904	MeJA responsiveness
		TC-rich repeats	GTTTTCTTAC	1674	defense and stress responsiveness
		circadian	CAAAGATATC	867	circadian control
		ABRE	ACGTG	42	ABA responsiveness
		GARE-motif	TCTGTTG	256	GA responsiveness
		ARE	AAACCA	692	anaerobic induction
CsCML29	KGN62011	GT1-motif	GGTTAA	465	light responsive element
		G-box	CACGAC	197	light responsive element
		ARE	AAACCA	622	anaerobic induction
		TGA-element	AACGAC	767	Auxin responsiveness
CsCML30	KGN62012	G-box	TACGTG	951	light responsive element
		GT1-motif	GGTTAAT	1517	light responsive element
		ABRE	ACGTG	951	ABA responsiveness
		HD-Zip 1	CAAT(A/T)ATTG	189	palisade mesophyll cells
		O2-site	GATGA(C/T)(A/G)TG(A/G)	578	zein metabolism regulation
		TGA-element	AACGAC	543	Auxin responsiveness
		ARE	AAACCA	16	anaerobic induction
		MBS	CAACTG	269	drought-inducibility
CsCML31	KGN62512	G-Box	CACGTT	1849	light responsive element
		GT1-motif	GGTTAA	393	light responsive element
		MRE	AACCTAA	1126	light responsive element
		ABRE	ACGTG	1982	light responsive element
		circadian	CAAAGATATC	246	circadian control
		ARE	AAACCA	549	anaerobic induction
CsCML32	KGN62513	CAT-box	GCCACT	804	meristem expression
		ARE	AAACCA	95	anaerobic induction
		ABRE	ACGTG	1346	ABA responsiveness
		MBS	CAACTG	125	drought-inducibility
		GT1-motif	GGTTAA	514	light responsive element
		G-Box	CACGTT	1345	light responsive element
		TCA-element	CCATCTTTTT	718	SA responsiveness
CsCML33	KGN62517	G-box	CACGTC	1966	light responsive element
		GT1-motif	GGTTAA	503	light responsive element
		ABRE	ACGTG	1966	ABA responsiveness
		ARE	AAACCA	1065	anaerobic induction
		O2-site	GATGACATGG	1846	zein metabolism regulation
		TGACG-motif	TGACG	934	MeJA responsiveness
		CGTCA-motif	CGTCA	934	MeJA responsiveness
		TCA-element	CCATCTTTTT	1403	SA responsiveness
		TC-rich repeats	GTTTTCTTAC	1965	defense and stress responsiveness
		P-box	CCTTTTG	910	GA responsiveness
CsCML34	KGN62522	SARE	TTCGACCATCTT	708	SA responsiveness
		ARE	AAACCA	1020	anaerobic induction
		G-box	TAACACGTAG	807	light responsive element
		GT1-motif	GGTTAA	1186	light responsive element
		ABRE	ACGTG	809	ABA responsiveness
		TCA-element	CCATCTTTTT	1249	SA responsiveness
		P-box	CCTTTTG	285	GA responsiveness
		TC-rich repeats	ATTCTCTAAC	678	defense and stress responsiveness
CsCML35	KGN62524	TGACG-motif	TGACG	1387	MeJA responsiveness
		CGTCA-motif	CGTCA	1387	MeJA responsiveness
		GCN4_motif	TGAGTCA	807	endosperm expression
		TCA-element	CCATCTTTTT	904	SA responsiveness
		circadian	CAAAGATATC	1239	circadian control
		GT1-motif	GGTTAA	758	light responsive element
		MRE	AACCTAA	426	light responsive element
		G-box	TACGTG	982	light responsive element
		ABRE	TACGTGTC	980	ABA responsiveness
		ARE	AAACCA	719	anaerobic induction
CsCML36	KGN62525	G-box	TACGTG	959	light responsive element
		MRE	AACCTAA	186	light responsive element
		ACE	CTAACGTATT	855	light responsive element
		GT1-motif	GGTTAAT	183	light responsive element
		TGA-element	AACGAC	1232	Auxin responsiveness
		ARE	AAACCA	1048	anaerobic induction
		CGTCA-motif	CGTCA	692	MeJA responsiveness
		TGACG-motif	TGACG	692	MeJA responsiveness
		TC-rich repeats	ATTCTCTAAC	228	defense and stress responsiveness
		ABRE	TACGTGTC	957	ABA responsiveness
CsCML37	KGN62526	TGACG-motif	TGACG	366	MeJA responsiveness
		CGTCA-motif	CGTCA	366	MeJA responsiveness
		MBS	CAACTG	1294	drought-inducibility
		TC-rich repeats	ATTCTCTAAC	96	defense and stress responsiveness
		TCA-element	CCATCTTTTT	1068	SA responsiveness
		ABRE	ACGTG	837	ABA responsiveness
		GT1-motif	GGTTAAT	144	light responsive element
		MRE	AACCTAA	141	light responsive element
		G-box	CCACGTAA	835	light responsive element
		ARE	AAACCA	1480	anaerobic induction
		AACA_motif	TAACAAACTCCA	1628	endosperm expression
CsCML38	KGN62844	ARE	AAACCA	908	anaerobic induction
		G-box	CACGTG	706	light responsive element
		ACE	CTAACGTATT	1447	light responsive element
		GT1-motif	GGTTAA	508	light responsive element
		TCA-element	TCAGAAGAGG	686	SA responsiveness
		ABRE	CACGTG	706	ABA responsiveness
CsCML39	KGN63180	ACE	GACACGTATG	362	light responsive element
		GT1-motif	GGTTAA	195	light responsive element
		G-Box	CACGTT	1704	light responsive element
		MRE	AACCTAA	772	light responsive element
		TGACG-motif	TGACG	799	MeJA responsiveness
		CGTCA-motif	CGTCA	799	MeJA responsiveness
		MBS	CAACTG	285	drought-inducibility
		AuxRR-core	GGTCCAT	528	Auxin responsiveness
		ABRE	AACCCGG	595	ABA responsiveness
		ARE	AAACCA	136	anaerobic induction
CsCML40	KGN63491	MBS	CAACTG	1693	drought-inducibility
		TGACG-motif	TGACG	117	MeJA responsiveness
		CGTCA-motif	CGTCA	117	MeJA responsiveness
		GCN4_motif	TGAGTCA	316	endosperm expression
		GT1-motif	GGTTAA	675	light responsive element
		G-Box	CACGTT	1325	light responsive element
		TCA-element	CCATCTTTTT	1126	SA responsiveness
		RY-element	CATGCATG	337	seed-specific regulation
		ABRE	ACGTG	1326	ABA responsiveness
		ARE	AAACCA	171	anaerobic induction
		TGA-element	AACGAC	904	Auxin responsiveness
CsCML41	KGN63786	TC-rich repeats	GTTTTCTTAC	336	defense and stress responsiveness
		P-box	CCTTTTG	818	GA responsiveness
		GT1-motif	GGTTAAT	824	light responsive element
		G-box	CACGAC	797	light responsive element
		TGACG-motif	TGACG	1191	phytochrome down-regulation expression
		AAGAA-motif	GAAAGAA	1978	MeJA responsiveness
		CGTCA-motif	CGTCA	1978	MeJA responsiveness
		GCN4_motif	TGAGTCA	1153	endosperm expression
		ARE	AAACCA	267	anaerobic induction
CsCML42	KGN63870	GT1-motif	GGTTAA	1956	light responsive element
		ACE	CTAACGTATT	379	light responsive element
CsCML43	KGN64007	TCA-element	TCAGAAGAGG	1019	SA responsiveness
		Sp1	GGGCGG	1836	light responsive element
		G-Box	CACGTG	108	light responsive element
		3-AF1 binding site	TAAGAGAGGAA	1930	light responsive element
		CAT-box	GCCACT	1336	meristem expression
		WUN-motif	AAATTTCCT	315	wound-responsive
		ABRE	CGCACGTGTC	106	ABA responsiveness
		ARE	AAACCA	779	anaerobic induction
		TGA-element	AACGAC	537	Auxin responsiveness
CsCML44	KGN64933	CGTCA-motif	CGTCA	1856	MeJA responsiveness
		TGACG-motif	TGACG	188	MeJA responsiveness
		P-box	CCTTTTG	1815	GA responsiveness
		GARE-motif	TCTGTTG	1827	GA responsiveness
		ARE	AAACCA	399	anaerobic induction
		GT1-motif	GGTTAA	464	light responsive element
		LTR	CCGAAA	1087	low-temperature responsiveness
