# Supplementary material for: Genome-wide identification and expression analysis of calmodulin-like proteins in cucumber
Source: PeerJ. 2023 Jan 13;11:e14637. doi: 10.7717/peerj.14637 (PMC9841910; doi:10.7717/peerj.14637)
Supplement: Supplemental Information 4 [file peerj-11-14637-s004.xlsx]

## Sheet: Sheet1
Data S3. The expression level of CsCML genes in different tissues and under different conditions
	Leaf		Stem		Flower		Peel		Control		ABA		GA3		Low temperature		Drought
	Average	SE	Average	SE	Average	SE	Average	SE	Average	SE	Average	SE	Average	SE	Average	SE	Average	SE
CsCML1	1.0047	0.0671333	0.202271	0.0469613	5.96216	0.146015	0.559301	0.0216976	1.0047	0.0671333	0.790253	0.0148285	0.69793	0.0429229	1.16361	0.0350219	6.55584	0.116357
CsCML2	0.415162	0.0304561	0.075659	0.00181844	1.00089	0.0296362	4.17086	0.405086	1.0057	0.0737777	0.721007	0.0156129	0.23795	0.0205901	0.447209	0.0152464	2.686	0.0980051
CsCML3	2.47271	0.137748	0.265588	0.00686952	18.3714	0.589836	1.00014	0.0117606	1.0032	0.0558855	1.25082	0.0112317	0.0316318	0.00124561	0.0356284	0.00257891	3.9095	0.307613
CsCML4	0.373818	0.0015122	0.0436159	0.00346411	7.09959	0.230985	1.00282	0.0532681	1.00002	0.00404534	0.37554	0.0350431	0.174143	0.0118421	0.226261	0.00881897	0.829085	0.0725531
CsCML5	0.197497	0.0109946	0.0887834	0.00385228	1.00051	0.0224684	4.93218	0.199113	1.00319	0.0558471	3.86931	0.0571635	2.40026	0.149605	3.04081	0.136447	1.01468	0.304217
CsCML6	0.266338	0.142528	0.107874	0.0351208	1.25835	0.540951	4.33182	0.75671	1.45532	0.778797	737.27	24.615	353.425	21.2115	270.261	7.358	1547.17	30.3438
CsCML7	0.710427	0.00359758	0.159678	0.0518399	1.67154	0.0717744	1.02208	0.146033	1.00003	0.0050641	1.07428	0.0441765	0.896239	0.260414	0.506458	0.014684	1.00369	0.0935706
CsCML8	0.234872	0.0389163	0.444737	0.141272	5.1548	2.10559	1.00401	0.0620336	1.02738	0.170228	0.872033	0.0239836	0.495535	0.0257333	0.225437	0.00592593	1.56002	0.0841875
CsCML9	0.896119	0.00923343	0.0597134	0.00622979	1.00181	0.0419857	1.15584	0.136347	1.00031	0.0173759	0.303727	0.00540544	0.0525855	0.00128322	0.214248	0.00353791	0.742118	0.0704613
CsCML10	0.5185	0.0376609	1.10557	0.36881	8.62792	3.30923	0.605385	0.0100534	1.00516	0.073009	0.491768	0.00885356	0.181385	0.00841916	0.195806	0.019059	0.987571	0.0303293
CsCML11	1.00577	0.0766788	0.385883	0.139753	2.82123	1.12974	0.109907	0.00310864	1.00577	0.0766788	0.134422	0.00911652	0.128765	0.00458106	0.0778804	0.000400343	1.6848	0.055226
CsCML12	1.10106	0.0889211	0.734543	0.273193	1.16524	0.477803	0.975569	0.0166261	1.00628	0.0812662	0.187988	0.00617132	0.105377	0.0039807	0.172918	0.00599408	0.338799	0.0114374
CsCML13	0.738272	0.0453903	1.09864	0.355088	26.5338	10.0557	0.640656	0.118762	1.00384	0.0617178	0.346909	0.00355825	0.357917	0.0149467	0.35127	0.00827046	0.54442	0.0291554
CsCML14	0.372464	0.0310411	0.953481	0.379509	1.08255	0.317833	3.34559	0.519378	1.00684	0.0839102	0.268323	0.0406196	0.562017	0.027892	0.111195	0.0140554	1.99565	0.490012
CsCML15	0.848696	0.00887639	0.974664	0.00472544	1.4758	0.0876909	1.00471	0.069667	1.00011	0.01046	0.727805	0.0302547	0.539492	0.00807726	0.538881	0.0489664	3.99383	0.114114
CsCML16	1.00155	0.0388531	0.24696	0.00850924	2.98969	0.0916201	0.8817	0.0669474	1.00155	0.0388531	0.603926	0.021786	0.421331	0.0283169	0.434395	0.0511199	2.49717	0.325671
CsCML17	0.313442	0.0188548	0.107172	0.00680754	1.42291	0.0369744	1.00147	0.0388147	1.0035	0.0603643	1.21781	0.0510864	1.06863	0.0578345	0.767628	0.0398572	6.05503	0.120619
CsCML18	1.00275	0.0519613	0.36712	0.00483877	0.855231	0.0314494	1.36783	0.131149	1.00275	0.0519613	0.127114	0.0082077	0.120384	0.000763941	0.239071	0.0106279	0.126114	0.0147976
CsCML19	0.770042	0.0363187	1.00009	0.00968382	4.04274	0.108156	0.559798	0.0664312	1.00216	0.0472667	0.273697	0.00400485	0.333574	0.0066207	0.772693	0.0521411	3.03079	0.125142
CsCML20	0.0475054	0.00111224	0.493596	0.0087016	4.66579	0.279164	1.00573	0.0760411	1.00056	0.0234259	2.22299	0.212973	3.16609	0.271241	2.71912	0.0575589	57.6819	18.8585
CsCML21	0.568024	0.024272	0.798292	0.0397946	1.00144	0.0375489	1.5584	0.298272	1.00179	0.0428072	0.30255	0.00776213	0.306585	0.0149381	0.352367	0.0157908	0.172752	0.0279414
CsCML22	0.891603	0.0132365	0.834617	0.0151132	1.95822	0.0505721	1.0005	0.0223761	1.00022	0.014849	0.407322	0.0114528	0.234787	0.0068402	0.449543	0.00756408	0.482513	0.00401542
CsCML23	0.326661	0.0476206	1.04057	0.215876	0.871278	0.197899	17.0848	1.0368	1.00091	0.0302183	0.401342	0.0154964	0.0563978	0.00152944	0.150375	0.00199676	0.722552	0.0354076
CsCML24	0.839778	0.0479017	1.01032	0.0995255	0.638117	0.0607873	2.3041	0.0931865	1.00319	0.0572231	0.264529	0.00957253	0.218025	0.00452905	0.292565	0.00255755	0.948703	0.167987
CsCML25	0.394108	0.00396919	1.0441	0.0122543	1.00024	0.0153943	0.101069	0.00489443	1.00011	0.0103049	0.158449	0.00293967	0.105814	0.00138519	0.155249	0.00297441	0.145283	0.0194532
CsCML26	1.00032	0.018109	0.617255	0.0408304	8.33094	0.249183	0.229559	0.00369691	1.00032	0.018109	0.37037	0.00448163	0.154285	0.0132817	0.450773	0.00492696	2.83724	0.11037
CsCML27	0.160275	0.0338712	1.89129	0.357973	1.03816	0.187173	0.22171	0.0117578	1.04287	0.220391	0.684149	0.362394	0.537043	0.0655898	0.448749	0.0301982	59.2441	7.43671
CsCML28	5.67367	0.183643	1.00025	0.0157227	0.917348	0.0469332	0.909835	0.0247405	1.00104	0.0324012	0.070189	0.00326013	0.10329	0.00394671	0.103189	0.00258715	0.279933	0.00818392
CsCML29	0.723569	0.0124398	0.298517	0.000993679	5.02244	0.232913	1.0002	0.0142597	1.00029	0.0171973	0.568256	0.00481938	0.486273	0.0131704	0.401396	0.0155599	3.30727	0.102672
CsCML30	0.791055	0.0546786	0.558296	0.0402056	4.40359	0.146146	1.00081	0.0282963	1.00472	0.0694475	0.361661	0.0242478	0.333375	0.0215088	0.319054	0.00546372	1.38534	0.20979
CsCML31	0.00983131	0.00168688	0.00232199	0.000886522	18.3301	0.540158	1.00029	0.0170487	1.03058	0.17683	11.4367	0.383845	10.5619	0.325344	7.5624	0.476244	1.28833	0.302568
CsCML32	0.493941	0.00883479	1.00433	0.0645046	0.507898	0.0664325	10.7822	0.0733366	1.00032	0.017892	1.78221	0.0228913	3.34888	0.188804	3.66844	0.0690384	3.8595	1.08075
CsCML33	0.49532	0.0361699	0.887722	0.0442818	1.6972	0.0350321	1.00115	0.0342228	1.00529	0.0734093	0.781165	0.0235116	0.619082	0.032851	0.861042	0.00475479	0.757683	0.121115
CsCML34	0.572749	0.00722368	0.17046	0.0424359	1.00355	0.0608036	4.11641	0.214079	1.00016	0.0126143	0.389492	0.0212673	0.599785	0.0363754	0.56043	0.0219153	1.04213	0.395368
CsCML35	0.784717	0.0239409	1.00007	0.00834276	2.5043	0.0236007	0.780774	0.0171364	1.00094	0.0305376	0.420272	0.0474247	0.375614	0.0142624	0.597062	0.0114277	1.46067	0.154727
CsCML36	1.00071	0.0267386	8.58636	0.113035	0.87189	0.0484157	0.235232	0.00269456	1.00071	0.0267386	4.05663	0.610745	2.12474	0.452959	3.2875	0.0628415	22.2141	2.32554
CsCML37	0.866541	0.0150523	1.00017	0.012872	4.16799	0.249549	0.264578	0.00563069	1.02193	0.148977	1.98372	0.0675066	1.49906	0.120277	2.09697	0.0228507	5.0275	0.949864
CsCML38	0.282068	0.0116549	1.00632	0.08034	1.03252	0.0420917	5.06556	0.46395	1.00167	0.0413885	5.4942	0.170188	2.56955	0.0889935	3.15527	0.237077	38.5548	3.04638
CsCML39	1.93733	0.0491476	0.869082	0.490063	1.0003	0.0174002	0.556119	0.0260794	1.00065	0.0253853	0.0467174	0.000941708	0.0227512	0.00042817	0.021204	0.000661671	0.108181	0.0125395
CsCML40	0.456538	0.0345995	1.00074	0.0273642	1.12796	0.021518	0.146592	0.00901558	1.00598	0.0762395	0.155682	0.0070293	0.0502039	0.00311087	0.0783805	0.0025046	3.06181	0.00875961
CsCML41	1.00091	0.0302183	0.938861	0.0256692	2.18317	0.0652753	0.683568	0.0399664	1.0001	0.0100723	0.0717359	0.0017587	0.030488	0.00210855	0.037502	0.000644929	0.639665	0.0502929
CsCML42	1.00003	0.00503138	0.485253	0.0161044	2.10632	0.0491436	0.20023	0.0228691	1.00003	0.00503138	0.267964	0.0101451	0.0403994	0.000775706	0.480817	0.0126676	1.09577	0.0718756
CsCML43	0.774221	0.0270482	0.21295	0.00823874	1.00267	0.0522107	2.5992	0.199052	1.00125	0.0349798	2.36379	0.165452	0.2642	0.0120796	0.348161	0.019041	8.6269	0.558204
CsCML44	0.0760475	0.00224553	0.0962158	0.058507	1.00575	0.07638	2.63391	0.23295	1.00088	0.029554	3.59368	0.102885	2.3135	0.057678	4.54027	0.113623	1.84726	0.0961464
