# Supplementary material for: Genome-wide identification and expression analysis of calmodulin-like proteins in cucumber
Source: PeerJ. 2023 Jan 13;11:e14637. doi: 10.7717/peerj.14637 (PMC9841910; doi:10.7717/peerj.14637)
Supplement: Supplemental Information 5 [file peerj-11-14637-s005.xlsx]

## Sheet: Sheet1
Data S4. Syntenic gene pairs between cucumber and both Arabidopsis and tomato
Cucumber			Arabidopsis	Tomato	Cucumber chromosome
CsCML1	KGN43936	Csa_7G073720	AT2G15680.1		7
CsCML2	KGN46235	Csa_6G076830			6
CsCML3	KGN47684	Csa_6G376250			6
CsCML4	KGN50423	Csa_5G173500			5
CsCML5	KGN51467	Csa_5G561760			5
CsCML6	KGN51513	Csa_5G571560			5
CsCML7	KGN52027	Csa_5G608150			5
CsCML8	KGN52351	Csa_5G627080			5
CsCML9	KGN52470	Csa_5G636620	AT3G29000.1	Solyc02g088090.1.1/Solyc02g067220.3.1	5
CsCML10	KGN54524	Csa_4G355130			4
CsCML11	KGN54599	Csa_4G376140			4
CsCML12	KGN55185	Csa_4G639730		Solyc04g079080.2.1	4
CsCML13	KGN55186	Csa_4G639740			4
CsCML14	KGN55728	Csa_3G008850		Solyc08g076493.1.1	3
CsCML15	KGN55913	Csa_3G036390			3
CsCML16	KGN56046	Csa_3G061000			3
CsCML17	KGN56734	Csa_3G130890		Solyc09g092020.3.1	3
CsCML18	KGN56931	Csa_3G144210	AT3G22930.1/AT4G14640.1	Solyc06g053930.3.1	3
CsCML19	KGN57816	Csa_3G319280			3
CsCML20	KGN57835	Csa_3G345360			3
CsCML21	KGN58193	Csa_3G588520			3
CsCML22	KGN58678	Csa_3G727960		Solyc10g074740.1.1	3
CsCML23	KGN59507	Csa_3G823060			3
CsCML24	KGN59556	Csa_3G825010	AT3G29000.1	Solyc02g088090.1.1	3
CsCML25	KGN59929	Csa_3G854250			3
CsCML26	KGN60706	Csa_2G007990			2
CsCML27	KGN60815	Csa_2G011480			2
CsCML28	KGN61657	Csa_2G215510			2
CsCML29	KGN62011	Csa_2G286440			2
CsCML30	KGN62012	Csa_2G286450			2
CsCML31	KGN62512	Csa_2G357350			2
CsCML32	KGN62513	Csa_2G357850			2
CsCML33	KGN62517	Csa_2G358880			2
CsCML34	KGN62522	Csa_2G359910			2
CsCML35	KGN62524	Csa_2G359930		Solyc12g088850.1.1	2
CsCML36	KGN62525	Csa_2G359940			2
CsCML37	KGN62526	Csa_2G359950			2
CsCML38	KGN62844	Csa_2G376820			2
CsCML39	KGN63180	Csa_2G406780			2
CsCML40	KGN63491	Csa_1G002110			1
CsCML41	KGN63786	Csa_1G015780			1
CsCML42	KGN63870	Csa_1G025020		Solyc03g118810.1.1	1
CsCML43	KGN64007	Csa_1G033260		Solyc06g069740.1.1/Solyc03g115930.2.1	1
CsCML44	KGN64933	Csa_1G164670		Solyc11g068460.2.1	1
